# Supplementary material for: Solvent effects on de-excitation channels in the p-coumaric acid methyl ester anion, an analogue of the photoactive yellow protein (PYP) chromophore
Source: Royal Society of Chemistry journal article supplement (doi:10.1039/c6cp03541h), 2016-01-01
Supplement: c6cp03541h1.pdf [file c6cp03541h1.pdf]

**Supporting Information for:**

**Solvent Effects on De-Excitation Channels in *p*-Coumaric Acid Methyl Ester Anion, an Analogue of the Photoactive Yellow Protein Chromophore (PYP)**

*Francisco F. García-Prieto*<sup>1</sup>, *Aurora Muñoz-Losa*<sup>2</sup>, *M. L. Sánchez*<sup>1</sup>, *M. Elena Martín*<sup>1</sup>  
and *Manuel A. Aguilar*<sup>1</sup>

Correspondence to: M. A. Aguilar (e-mail: maguilar@unex.es)

<sup>1</sup>*Área de Química Física, University of Extremadura, Avda. Elvas s/n, Edif. José M<sup>a</sup> Viguera Lobo 3<sup>a</sup>, planta Badajoz, 06006, (Spain)*

<sup>2</sup>*Institute of Theoretical Chemistry, Faculty of Chemistry, University of Vienna, Währinger Str. 17, A-1090 Vienna (Austria)*

**Gas phase structures**

**SO**

|   |           |           |           |
|---|-----------|-----------|-----------|
| O | 4.992590  | -0.374243 | -0.000377 |
| C | 3.775220  | -0.182754 | -0.000234 |
| C | 2.808628  | -1.272815 | -0.000194 |
| H | 3.208561  | -2.280677 | -0.000298 |
| C | 1.452661  | -1.057673 | -0.000035 |
| H | 0.792965  | -1.918098 | -0.000015 |
| C | 0.881790  | 0.252682  | 0.000104  |
| C | 1.818218  | 1.330301  | 0.000067  |
| H | 1.430046  | 2.344942  | 0.000170  |
| C | 3.179303  | 1.142548  | -0.000090 |
| H | 3.856782  | 1.988914  | -0.000113 |
| C | -0.510831 | 0.517105  | 0.000282  |
| H | -0.781285 | 1.568966  | 0.000349  |
| C | -1.578749 | -0.348056 | 0.000400  |
| H | -1.462482 | -1.421365 | 0.000369  |
| C | -2.940068 | 0.147066  | 0.000635  |
| O | -3.316952 | 1.291430  | 0.000671  |
| O | -3.842922 | -0.868774 | 0.000868  |
| C | -5.193994 | -0.503397 | 0.001385  |
| H | -5.763099 | -1.432174 | 0.001237  |
| H | -5.451384 | 0.082010  | 0.885300  |

H -5.451928 0.082641 -0.881941

**S1<sup>P</sup>**

O 4.96782 -0.50571 -0.00023  
C 3.74476 -0.27200 -0.00014  
C 2.73313 -1.29829 0.00001  
H 3.07008 -2.32744 0.00004  
C 1.36675 -0.99822 0.00011  
H 0.65469 -1.80894 0.00022  
C 0.89462 0.35339 0.00006  
C 1.87799 1.37915 -0.00009  
H 1.55085 2.41223 -0.00013  
C 3.23846 1.09414 -0.00018  
H 3.97323 1.88986 -0.00029  
C -0.52701 0.70649 0.00015  
H -0.78469 1.75594 0.00010  
C -1.57338 -0.24020 0.00032  
H -1.38238 -1.30086 0.00040  
C -2.94216 0.15704 0.00041  
O -3.39850 1.28815 0.00037  
O -3.80136 -0.91882 0.00056  
C -5.16165 -0.61781 0.00150  
H -5.69129 -1.57170 0.00034  
H -5.45310 -0.04522 0.88503  
H -5.45379 -0.04260 -0.88002

**S1<sup>α</sup>**

O 4.94745 -0.40429 -0.23802  
C 3.73265 -0.19592 -0.13665  
C 3.19021 1.15136 -0.06326  
H 3.89658 1.97050 -0.10497  
C 1.83418 1.36423 0.05438  
H 1.44951 2.37382 0.10541  
C 0.88779 0.29188 0.11458  
C 1.42114 -1.03405 0.03386  
H 0.72082 -1.85756 0.06921  
C 2.77053 -1.28514 -0.08389  
H 3.16225 -2.29260 -0.14115  
C -0.56245 0.54076 0.25181  
H -0.97400 0.60283 1.25132  
C -1.41184 0.69719 -0.87169  
H -1.00499 0.63584 -1.87315  
C -2.79232 0.93410 -0.75962

O -3.48219 1.04417 0.24653  
O -3.41559 1.05250 -2.00105  
C -4.78308 1.28777 -1.97143  
H -5.11386 1.35396 -3.01126  
H -5.33259 0.48377 -1.47410  
H -5.03347 2.22058 -1.45869

### **S1<sup>β</sup>**

O 4.53536 -1.09859 0.21666  
C 3.42504 -0.55060 0.09283  
C 2.22140 -1.27389 -0.26786  
H 2.31830 -2.34253 -0.42925  
C 0.99724 -0.66376 -0.40734  
H 0.14453 -1.27773 -0.68053  
C 0.79644 0.74130 -0.21246  
C 1.98142 1.46683 0.14922  
H 1.89761 2.53717 0.31515  
C 3.21080 0.86271 0.29137  
H 4.07838 1.45531 0.56464  
C -0.44946 1.38403 -0.35918  
H -0.49334 2.46169 -0.23635  
C -1.68106 0.72171 -0.80278  
H -1.93779 0.63035 -1.85459  
C -2.67152 0.15364 0.10610  
O -2.65090 0.19067 1.30662  
O -3.68884 -0.44446 -0.56172  
C -4.69052 -1.03158 0.22446  
H -5.41004 -1.46340 -0.46886  
H -4.28492 -1.81407 0.86657  
H -5.18702 -0.29278 0.85513

### **Water solution structures for the last ASEP/MD cycle**

#### **S0**

O 5.002043 -0.413778 0.018645  
C 3.727143 -0.194604 0.003954  
C 2.786153 -1.261043 -0.006059  
H 3.160872 -2.276358 -0.006416  
C 1.417694 -1.035028 -0.009904  
H 0.750053 -1.885520 -0.015192  
C 0.894816 0.273710 -0.007715  
C 1.811659 1.338781 -0.006394

|   |           |           |           |
|---|-----------|-----------|-----------|
| H | 1.444024  | 2.358690  | -0.006070 |
| C | 3.186158  | 1.114434  | -0.002706 |
| H | 3.870191  | 1.953255  | 0.002016  |
| C | -0.537077 | 0.563641  | -0.008981 |
| H | -0.795211 | 1.614414  | -0.017508 |
| C | -1.550463 | -0.326080 | -0.004042 |
| H | -1.403391 | -1.394619 | -0.003615 |
| C | -2.946739 | 0.134653  | 0.000466  |
| O | -3.293597 | 1.288733  | 0.008128  |
| O | -3.808593 | -0.866675 | -0.002023 |
| C | -5.186208 | -0.533281 | 0.009271  |
| H | -5.721526 | -1.475680 | 0.007702  |
| H | -5.434539 | 0.035137  | 0.902788  |
| H | -5.446015 | 0.045503  | -0.873958 |

### ***S1<sup>P</sup>***

|   |           |           |           |
|---|-----------|-----------|-----------|
| O | 4.956046  | -0.492293 | 0.000909  |
| C | 3.723451  | -0.253410 | 0.002062  |
| C | 2.735559  | -1.293360 | 0.005935  |
| H | 3.082830  | -2.317479 | 0.009460  |
| C | 1.375489  | -1.008077 | 0.001420  |
| H | 0.676129  | -1.828763 | 0.000356  |
| C | 0.901355  | 0.346972  | -0.004340 |
| C | 1.874487  | 1.389025  | -0.005283 |
| H | 1.540121  | 2.417296  | -0.008128 |
| C | 3.230032  | 1.110197  | -0.001524 |
| H | 3.960782  | 1.906764  | -0.000928 |
| C | -0.511166 | 0.683505  | -0.006098 |
| H | -0.776616 | 1.729356  | -0.008239 |
| C | -1.552590 | -0.283575 | -0.002254 |
| H | -1.354018 | -1.343791 | 0.001856  |
| C | -2.919373 | 0.116457  | 0.002656  |
| O | -3.325851 | 1.276243  | 0.012480  |
| O | -3.798820 | -0.905797 | -0.005375 |
| C | -5.173262 | -0.567218 | -0.002362 |
| H | -5.715914 | -1.507180 | -0.003248 |
| H | -5.431968 | 0.004584  | 0.886099  |
| H | -5.433462 | 0.009481  | -0.887781 |

### ***Cl<sup>α</sup>***

|   |          |          |           |
|---|----------|----------|-----------|
| O | 4.801542 | 0.376024 | -0.544366 |
| C | 3.612802 | 0.181128 | -0.262178 |

|   |           |           |           |
|---|-----------|-----------|-----------|
| C | 3.040496  | -1.145749 | -0.386528 |
| H | 3.686480  | -1.931844 | -0.747981 |
| C | 1.728872  | -1.363196 | -0.026132 |
| H | 1.302339  | -2.348990 | -0.092377 |
| C | 0.909530  | -0.313588 | 0.476039  |
| C | 1.463529  | 1.011899  | 0.548811  |
| H | 0.833465  | 1.810500  | 0.901202  |
| C | 2.765766  | 1.265156  | 0.206282  |
| H | 3.208096  | 2.248084  | 0.275526  |
| C | -0.530790 | -0.572479 | 0.880699  |
| H | -0.725179 | -0.271061 | 1.905615  |
| C | -1.450857 | -0.015553 | -0.172471 |
| H | -1.139139 | 0.022205  | -1.210356 |
| C | -2.818070 | 0.039671  | 0.088923  |
| O | -3.377422 | -0.073542 | 1.188978  |
| O | -3.634504 | 0.230902  | -1.006145 |
| C | -5.019464 | 0.194631  | -0.773531 |
| H | -5.498623 | 0.347842  | -1.738298 |
| H | -5.333711 | -0.767886 | -0.372286 |
| H | -5.336353 | 0.980266  | -0.089605 |

### *CI<sup>β</sup>*

|   |           |           |           |
|---|-----------|-----------|-----------|
| O | 4.117876  | -1.330038 | -0.269580 |
| C | 3.086668  | -0.643549 | -0.079505 |
| C | 1.930512  | -1.202451 | 0.567327  |
| H | 1.984516  | -2.231227 | 0.898713  |
| C | 0.799756  | -0.460991 | 0.738623  |
| H | -0.069937 | -0.868009 | 1.230251  |
| C | 0.732028  | 0.911830  | 0.287889  |
| C | 1.905622  | 1.483835  | -0.340502 |
| H | 1.877663  | 2.514772  | -0.666358 |
| C | 3.036191  | 0.741474  | -0.507217 |
| H | 3.922792  | 1.149356  | -0.973567 |
| C | -0.462196 | 1.579639  | 0.382131  |
| H | -0.469809 | 2.608116  | 0.016541  |
| C | -1.653654 | 0.891352  | 0.857256  |
| H | -1.885614 | 0.858776  | 1.909818  |
| C | -2.413596 | 0.196525  | -0.078582 |
| O | -2.236013 | 0.191021  | -1.301518 |
| O | -3.492994 | -0.434720 | 0.446527  |
| C | -4.167117 | -1.339948 | -0.384606 |
| H | -4.940955 | -1.795455 | 0.228782  |
| H | -3.496151 | -2.118821 | -0.748777 |
| H | -4.625888 | -0.844623 | -1.237064 |

Table S1. PME parameters used during the molecular dynamics simulations.

|                |         |
|----------------|---------|
| rvdw           | 1.4 nm  |
| rlist          | 1.3 nm  |
| rcoulomb       | 1.3 nm  |
| fourierspacing | 0.12 nm |
| pme-order      | 6       |

Table S2. Forward and backward free energy values (kcal/mol) in water solution corresponding to the  $\Delta G_{\text{int}}$  free energy values showed in Table 8 of the main manuscript.

|             | Forward | Backward | Average value | std  |
|-------------|---------|----------|---------------|------|
| $S1^p$      | -       | -        | -             | -    |
| $CI^\alpha$ | -18.58  | -18.68   | -18.63        | 0.07 |
| $CI^\beta$  | -30.77  | -31.10   | -30.93        | 0.23 |
